1 **CITE-Viz: Replicating the Interactive Flow Cytometry Workflow in CITE-Seq**

2 Garth L. Kong<sup>1,\*</sup>, Thai T. Nguyen<sup>2,\*</sup>, Wesley K. Rosales<sup>2,\*</sup>, Anjali D. Panikar<sup>2,\*</sup>, John H. W.  
3 Cheney<sup>2,\*</sup>, Brittany M. Curtiss<sup>1</sup>, Sarah A. Carratt<sup>1</sup>, Theodore P. Braun<sup>1,†</sup>, Julia E. Maxson<sup>1,†</sup>

4

5 <sup>1</sup> Knight Cancer Institute, Oregon Health and Science University, Portland, OR 97239, United  
6 States of America

7 <sup>2</sup> Knight Campus Graduate Internship Program - Bioinformatics, University of Oregon, Eugene,  
8 OR 97403, United States of America

9 \* These authors contributed equally to the project

10 † Co-corresponding authors

11

12 **CORRESPONDING AUTHORS:**

13 Julia E. Maxson

14 Knight Cancer Institute

15 3181 SW Sam Jackson Pk. Rd., KR-HEM

16 Portland, OR, 97239, USA

17 [maxsonj@ohsu.edu](mailto:maxsonj@ohsu.edu)

18

19 Theodore P. Braun

20 Knight Cancer Institute

21 3181 SW Sam Jackson Pk. Rd., KR-HEM

22 Portland, OR, 97239, USA

23 braunt@ohsu.edu

24 **Abstract**

25 **Summary:** The rapid advancement of new genomic sequencing technology has enabled the  
26 development of multi-omic single-cell sequencing assays. These assays profile multiple  
27 modalities in the same cell and can often yield new insights not revealed with a single modality.  
28 For example, CITE-Seq (Cellular Indexing of Transcriptomes and Epitopes by Sequencing)  
29 simultaneously profiles the single-cell RNA transcriptome and the surface protein expression.  
30 The extra dimension of surface protein markers can be used to further identify cell clusters – an  
31 essential step for downstream analyses and interpretation. Additionally, multi-dimensional  
32 datasets like CITE-Seq require nuanced visualization methods to accurately assess the data. To  
33 facilitate cell cluster classification and visualization in CITE-Seq, we developed CITE-Viz.  
34 CITE-Viz is a single-cell visualization platform with a custom module that replicates the  
35 interactive flow-cytometry gating workflow. With CITE-Viz, users can investigate CITE-Seq  
36 specific quality control (QC) metrics, view multi-omic co-expression feature plots, and classify  
37 cell clusters by iteratively gating on the abundance of cell surface markers. CITE-Viz was  
38 developed to make multi-modal single-cell analysis accessible to a wide variety of biologists,  
39 with the aim to discover new insights into their data and to facilitate novel hypothesis generation.

40

41 **Availability and Implementation:** CITE-Viz installation and usage instructions can be found in  
42 the GitHub repository <https://github.com/maxsonBraunLab/CITE-Viz>

43 **Contact:** [maxsonj@ohsu.edu](mailto:maxsonj@ohsu.edu)

44 **Supplementary Information:** Down-sampled peripheral blood mononuclear dataset (Hao et al.  
45 2021): <https://bit.ly/3vxbhfW>

46

## 47 **1 Introduction**

48 The development of methodology enabling the high-throughput profiling of transcriptomes at the  
49 single-cell resolution (scRNA-Seq) has revealed previously unappreciated levels of cellular  
50 heterogeneity (Macosko et al. 2015). Since then, newer scRNA-Seq assays have been developed  
51 to profile multiple macromolecules in the same cell. For example, CITE-Seq is a multi-omic  
52 variant of scRNA-Seq that captures the cell surface proteome using antibody-derived tags (ADT)  
53 (Stoeckius et al. 2017). Multi-omic assays like CITE-Seq add new dimensionality to the data and  
54 enable novel insights, but often require nuanced approaches to extract meaningful results from  
55 the data.

56  
57 Data visualization and classification of cell clusters are commonly performed in single-cell  
58 analyses, but current methods fall short for multi-omic assays such as CITE-Seq. Single-cell  
59 visualization platforms like ShinyCell are often only compatible with one transcriptome assay  
60 (Ouyang et al. 2021), while SCHNAPPs emphasizes data preprocessing and lacks tools for cell  
61 cluster classification (Jagla et al. 2021). Cell cluster classification methods for CITE-Seq data  
62 include scGate (Andreatta et al.) and the Single-Cell Virtual Cytometer (Pont et al. 2020).  
63 However, these programs lack data visualization tools and easy-to-understand quality control  
64 (QC) metrics that are essential to holistically evaluate a single-cell experiment (Figure 1A). We  
65 identified a need for a tool that can better visualize multi-omic single-cell data and classify cell  
66 clusters, while remaining accessible to biologists with minimal computational training.

67  
68 Here we developed CITE-Viz, which enables users to visualize CITE-Seq data and classify cells  
69 by replicating the flow cytometry gating workflow. A flow cytometry workflow provides a

70 familiar interface to bench biologists, and the nature of sequential gates can narrow specific cell  
71 populations of interest, which is difficult to do on a traditional UMAP. In real time, users can  
72 iteratively subset cell populations of interest using surface proteins, and see those cells reflected  
73 in the original dimension reduction (e.g. PCA, tSNE, UMAP) space (forward-gate). Conversely,  
74 cells can be selected in dimension reduction (DR) space and quickly located in a 2D gate  
75 window (back-gate). Additionally, CITE-Viz provides interactive quality control plots and 2D  
76 multi-omic feature expression plots. In conclusion, CITE-Viz is a single-cell, multi-omic  
77 visualization platform with a custom module that replicates the interactive flow cytometry gating  
78 workflow.

79

## 80 **2 Methods**

81 CITE-Viz was built on the R-Shiny platform to process Seurat-analyzed data. CITE-Viz accepts  
82 a preprocessed Seurat object in RDS format with one sample or an integrated object. After  
83 loading the data, QC metrics such as counts data per assay, unique ADT antibodies, and  
84 mitochondrial expression, can be subset by any categorical metadata in the user's Seurat object  
85 (e.g. distribution of unique ADTs by patient donor sample).

86

87 The core of the flow cytometry workflow comes from a custom gate class. A gate class holds  
88 important metadata such as a custom gate label, X and Y axes labels (e.g. CD34, CD38, etc.),  
89 gate selection coordinates, input and output cell barcodes, etc. Most variables are intrinsic to a  
90 gate class except for the last, which is passed between gates. Gates are created by the  
91 simultaneous actions of a "Gate" button press and a rectangle selection of cells. Gates are saved

92 using a list and can be downloaded to facilitate further analyses such as differential expression.

93 Users can gate on any combinations of features and assays including SCT, RNA, ADT, etc.

94

### 95 **3 Results**

96 To demonstrate the utility of this program, CITE-Viz was used to re-analyze a peripheral blood  
97 mononuclear cell CITE-Seq dataset containing 211K cells and 225 antibody tags (Hao et al.  
98 2021). For visualization purposes, the dataset was randomly down-sampled to 10K cells and then  
99 QC was performed. One example of a QC metric in CITE-Seq is the number of unique  
100 antibodies per sample. Using CITE-Viz, the unique antibodies per sample is clearly displayed  
101 and significant differences can be identified between patients 1 – 4 and patients 5 – 8 with a  $p_{adj}$   
102 of 0 (Tukey HSD) (Figure 1B). To enable data exploration, CITE-Viz can also plot the relative  
103 expression levels of two features onto the UMAP simultaneously. An example is shown for  
104 CD16 and CD14 (ADT) markers, which reveals heterogeneous cell populations in the CD14 and  
105 CD16 monocytes (Figure 1C). This enables simultaneous exploration of two features in the  
106 dataset and enhances the data visualization capabilities of CITE-Viz.

107

108 Once markers of interest have been identified, cells can be classified by their expression of these  
109 markers using one or more “gates” in a flow cytometry-like workflow. An example of the  
110 classification of cell clusters with one gate is shown in Figure 1D, where cells with CD3+ and  
111 CD4+ surface protein signature represent a CD4 T cell population. Likewise, the same monocyte  
112 population from Figure 1C can also be orthogonally defined via the gating module using the  
113 CD11b+ and CD14+ markers (Figure 1E). Another type of one-layer gate is the back-gate unique  
114 to CITE-Viz, where selected cells in DR space are highlighted in the ADT space. For example, a

115 selection of B-cells from the UMAP space shows a distinct set of cells with an IgD<sup>+</sup> and  
116 CD27<sup>+/-</sup> signature (Figure 1F). To demonstrate serial gating, an initial CD45<sup>-</sup> and CD11b<sup>-</sup> gate  
117 selected a mixture of myeloid and lymphoid cells. From this gated cell subset, CD8<sup>+</sup> and CD4<sup>-</sup>  
118 cells were identified to as CD8 T cells, which are visualized as a distinct cell cluster on the  
119 UMAP (Figure 1G).

120

#### 121 **4 Discussion**

122 CITE-Viz is a single-cell multi-omic data visualization platform with an interactive module to  
123 help classify cell clusters. Users can see QC metrics clearly displayed and view multi-omic  
124 feature expressions with a 2-dimensional color matrix. Similar to flow cytometry, users can gate  
125 cells with antibodies (forward-gate) or gate from DR space (back-gate) in real time with minimal  
126 computational proficiency. The application of CITE-Viz to a peripheral blood mononuclear cell  
127 CITE-Seq dataset provided an orthogonal approach that was congruent with previously identified  
128 cell cluster identities (Hao et al. 2021).

129

130 A limitation of CITE-Viz pertains to data sparsity where gating by gene expression results in a  
131 high rate of data dropout. However, we speculate the development of better multi-omic  
132 sequencing assays will help resolve heterogeneous cell populations. Therefore, CITE-Viz was  
133 designed to gate cells based on any combination of assays and features to accommodate  
134 impending changes in sequencing technology. In conclusion, CITE-Viz provides a new user-  
135 friendly tool to visualize data and classify cell clusters in CITE-Seq data by replicating the  
136 iterative gating workflow of flow cytometry.

137

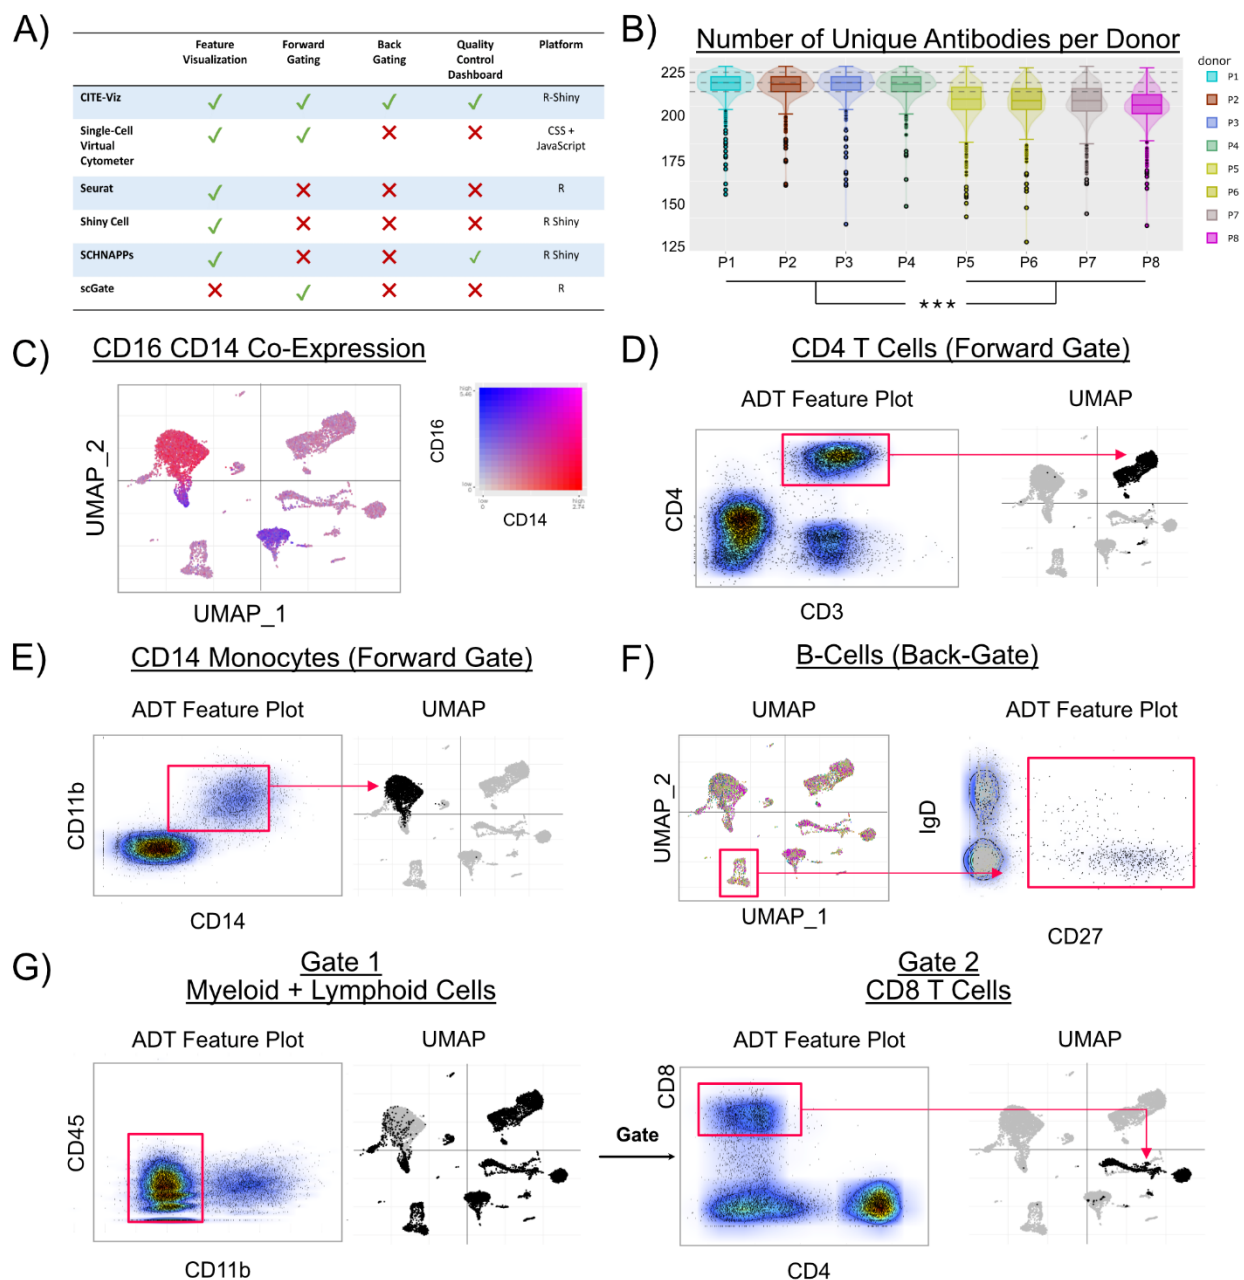

138

Figure 1 - CITE-Viz suite of features. A) Comparison of CITE-Viz versus similar bioinformatics tools. B) One example of a QC metric, number of unique antibodies subset by patient donors, reveals lower unique counts in patients 5 – 8 compared to 1 – 4. C) Co-expression plot of ADT features CD14 and CD16 shows heterogeneous monocyte population. D) 1-layer gate that resolves CD4 T cells. E) 1-layer gate that resolves CD14 monocytes. F) Back-gate of B-cells shows IgD+ and CD27+/- cell population. Cells in the lower half of the red box represents naive B-cells. G) 2-layer gate that resolves CD45- and CD11b- cells and then CD8 T cells.

139

140

141

142 **Data availability**

143 **Data Availability Statement:** The data underlying this article are available in GEO (Gene  
144 Expression Omnibus) at <https://www.ncbi.nlm.nih.gov/geo/>, and can be accessed with  
145 GSE164378. The down-sampled data via the supplementary material section.

146 **Acknowledgements**

147 We thank the following Oregon Health and Science University core facilities for their assistance:  
148 ExaCloud Cluster Computational Resource and the Advanced Computing Center.

149 **Funding:** This work was supported by the American Society of Hematology Research Restart  
150 Award; American Society of Hematology Scholar Award; National Cancer Institute [K08  
151 CA245224]. Funding for SAC was provided by the American Society of Hematology Research  
152 Restart Award; Collin's Medical Trust Award; Medical Research Foundation Early Clinical  
153 Award; and the National Cancer Institute [F32CA239422].

154 **Conflicts of Interest: none declared.**

155

156

157

158

159

160

161

162

163

164



165 **References**

- 166 Andreatta M, Berenstein AJ, Carmona SJ. scGate: marker-based purification of cell types from  
167 heterogeneous single-cell RNA-seq datasets. :3.
- 168 Hao Y, Hao S, Andersen-Nissen E, Mauck WM, Zheng S, Butler A, Lee MJ, Wilk AJ, Darby C,  
169 Zager M, et al. 2021. Integrated analysis of multimodal single-cell data. *Cell*. 184(13):3573-  
170 3587.e29. doi:10.1016/j.cell.2021.04.048.
- 171 Jagla B, Libri V, Chica C, Rouilly V, Mella S, Puceat M, Hasan M. 2021. SCHNAPPs - Single  
172 Cell sHiNy APPLication(s). *Journal of Immunological Methods*. 499:113176.  
173 doi:10.1016/j.jim.2021.113176.
- 174 Macosko EZ, Basu A, Satija R, Nemesh J, Shekhar K, Goldman M, Tirosh I, Bialas AR,  
175 Kamitaki N, Martersteck EM, et al. 2015. Highly Parallel Genome-wide Expression Profiling of  
176 Individual Cells Using Nanoliter Droplets. *Cell*. 161(5):1202–1214.  
177 doi:10.1016/j.cell.2015.05.002.
- 178 Ouyang JF, Kamaraj US, Cao EY, Rackham OJL. 2021. ShinyCell: simple and sharable  
179 visualization of single-cell gene expression data. Mathelier A, editor. *Bioinformatics*.  
180 37(19):3374–3376. doi:10.1093/bioinformatics/btab209.
- 181 Pont F, Tosolini M, Gao Q, Perrier M, Madrid-Mencía M, Huang TS, Neuvial P, Ayyoub M,  
182 Nazor K, Fournié J-J. 2020. Single-Cell Virtual Cytometer allows user-friendly and versatile  
183 analysis and visualization of multimodal single cell RNAseq datasets. *NAR Genomics and*  
184 *Bioinformatics*. 2(2):lqaa025. doi:10.1093/nargab/lqaa025.
- 185 Stoeckius M, Hafemeister C, Stephenson W, Houck-Loomis B, Chattopadhyay PK, Swerdlow H,  
186 Satija R, Smibert P. 2017. Simultaneous epitope and transcriptome measurement in single cells.  
187 *Nat Methods*. 14(9):865–868. doi:10.1038/nmeth.4380.
- 188
